# Supplementary material for: Genome-wide identification of PDX and expression analysis under waterlogging stress exhibit stronger waterlogging tolerance in transgenic Brassica napus plants overexpressing the BnaPDX1.3 gene compared to wild-type plants
Source: Frontiers journal article supplement (doi:10.3389/fpls.2025.1533219), 2025-02-12
Supplement: Data_Sheet_1.pdf [file Data_Sheet_1.pdf]

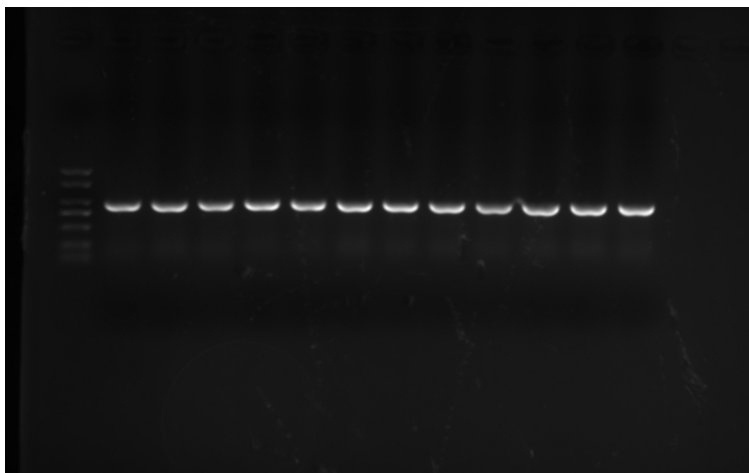

**Figure S1.** The target fragment with restriction sites

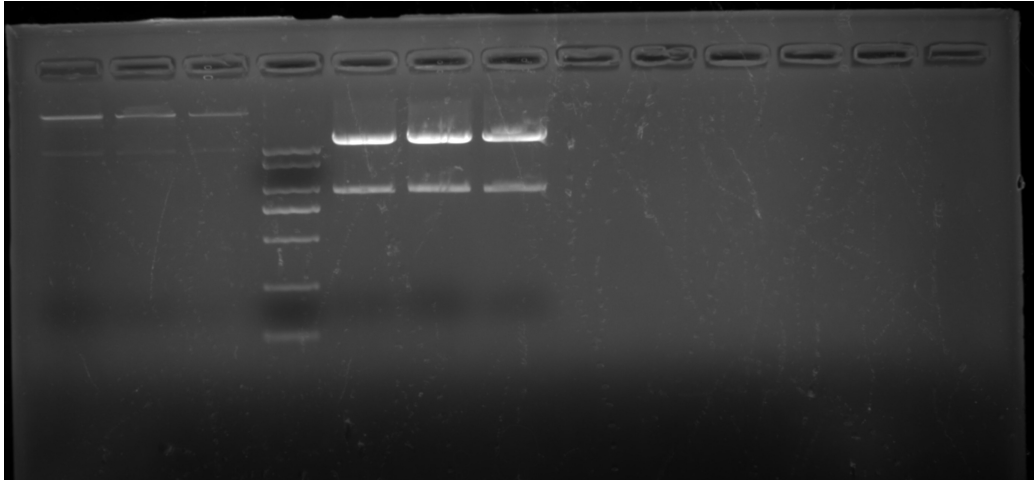

**Figure S2.** Double-enzyme digestion was used to validate the constructed overexpression vector (Three on the right).

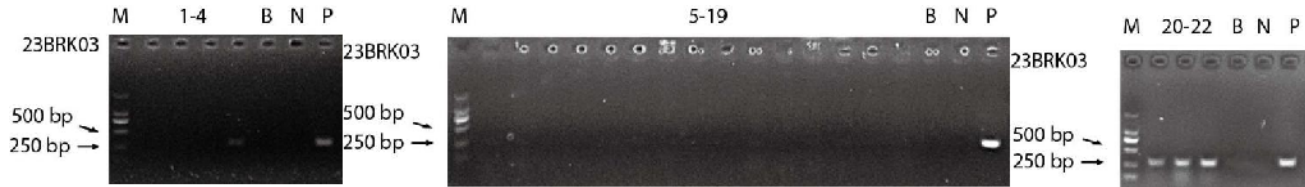

**Figure S3.** Positive detection of T0 transgenic seedlings.

M N P

1-22

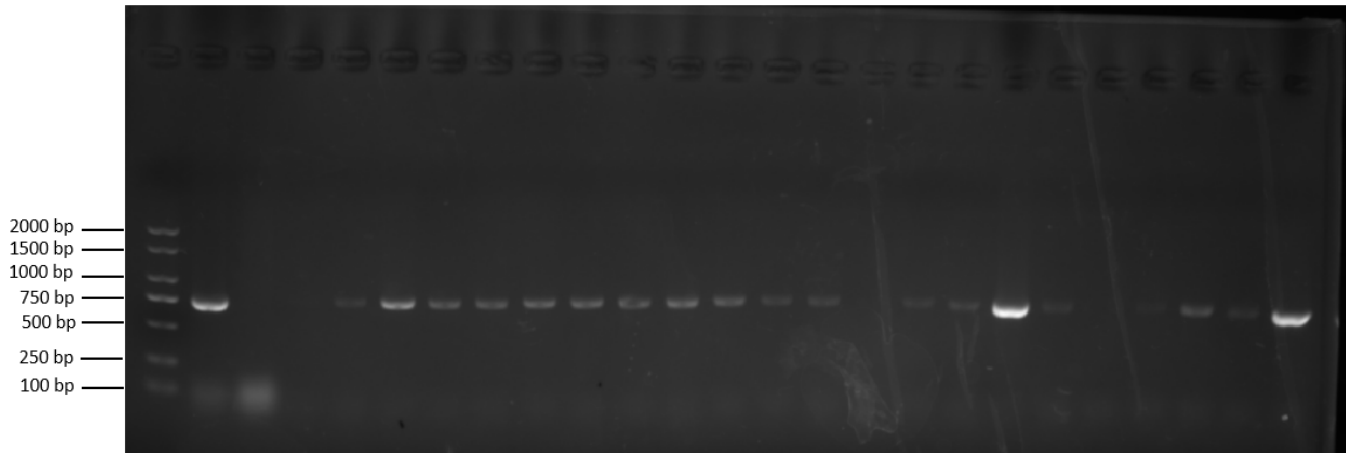

**Figure S4.** Positive detection of the T1 generation PDX1.3#20 transgenic plants.



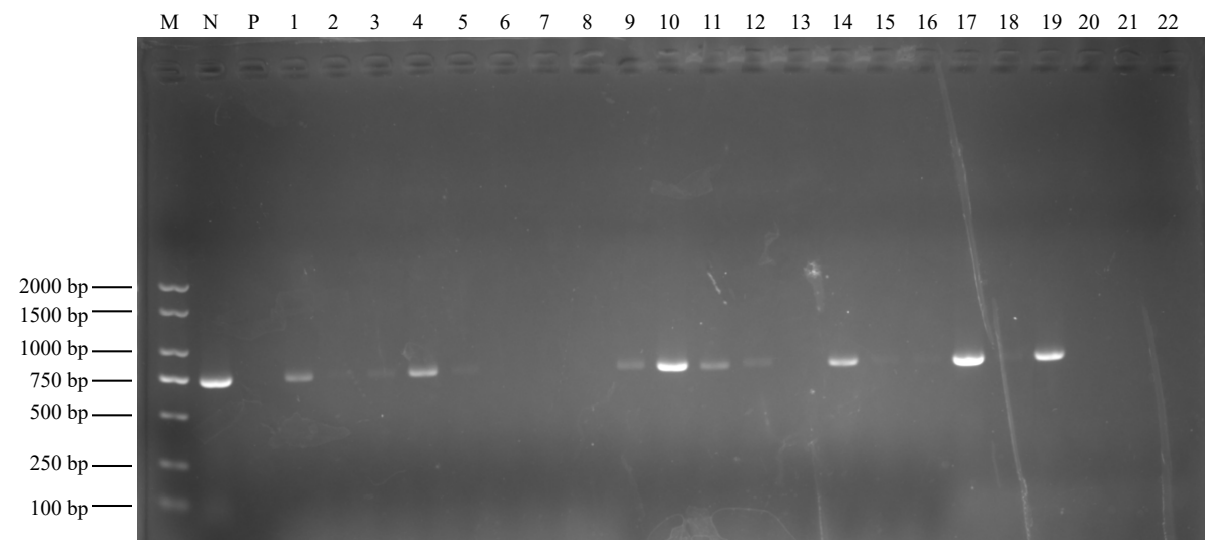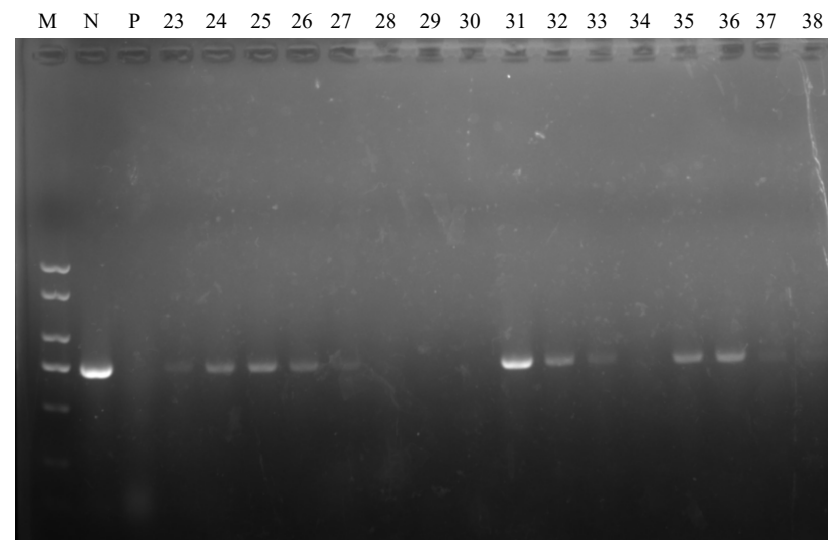

**Figure S5.** Positive detection of the T1 generation PDX1.3#21transgenic plants.

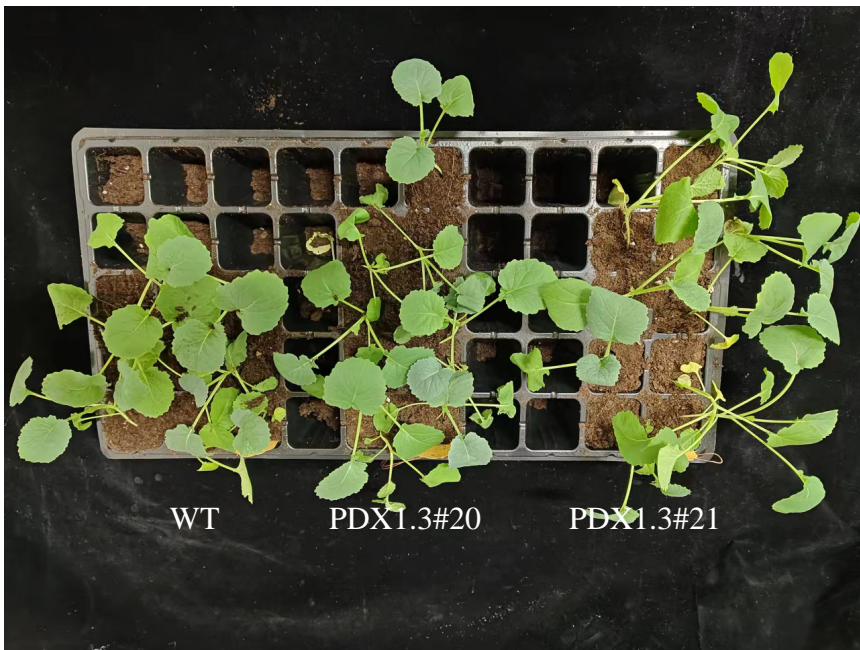

**Figure S6.** The phenotype of plants before waterlogging treatment.
